# Supplementary material for: Prevalence, Trend and Mortality Disparities in Chronic Liver Diseases in the U.S. across nativity
Source: Research Square preprint supplement (doi:10.21203/rs.3.rs-7461262/v1), 2025-10-14
Supplement: Supplementary file 1 [file 397a615d34268584cc386aa5.docx]

**Supplementary materials**

**Prevalence, Trend and Mortality Disparities in Chronic Liver Diseases in the U.S. across nativity**

**Supplementary method**

**Supplementary Figure 1.** Trends in immigration and corresponding characteristics in the United States during 1999-2020.

**Supplementary Figure 2.** Trends of FIB-4 index in SLD individuals across nativity in the United States during 1999-2018.

**Supplementary Table 1.** Prevalence of chronic liver diseases among immigrants stratified by demographic characteristics (NHANES 2017-2020).

**Supplementary Table 2.** Prevalence of chronic liver diseases among immigrants stratified by time stay in the United States (NHANES 2017-2020).

**Supplementary Table 3.** Risk factor contributing to chronic liver diseases among immigrants (NHANES 2017-2020).

**Supplementary Table 4.** All-cause or cause-specific mortality across nativity (NHANES 1999-2018).

**Supplementary Table 5.** Association between nativity and risk of all-cause or cause-specific mortality among participants with CLD (NHANES Ⅲ, hepatic steatosis diagnosed by ultrasound).

**Supplementary Table 6.** Association between nativity and risk of all-cause or specific-cause mortality among participants with CLD (NHANES Ⅲ, diagnosed by USFLI). **Supplementary Table 7.** Association between nativity and risk of specific-cause mortality among participants with chronic liver disease in Fine-Gray competing risk models.

**Supplementary Table 8.** Association between nativity and risk of all-cause mortality among participants with chronic liver disease across age, sex, race, BMI categories (NHANES 1999-2018).

**Supplementary Table 9.** Association between nativity and risk of other-cause mortality among participants with chronic liver disease across age, sex, race, BMI categories (NHANES 1999-2018).

**Supplementary Table 10.** Control of risk factors related to chronic liver disease in the United States (NHANES 2017-2020)

**Supplementary method**

**Inclusion and exclusion criteria**

SLD was defined by presence of hepatic steatosis. MASLD was diagnosed as steatosis with at least one cardiometabolic risk factor (CMRF) by excluding influence of significant alcohol consumption (≥ 140 g/week for female and ≥ 210 g/week for male) and other liver diseases. MetALD was defined as MASLD patients but having moderate alcohol consumption (140~350 g/week for female and 210~420 g/week for male). ALD was defined by presence of steatosis plus excessive alcohol consumption (≥ 350 g/week for female and ≥ 420 g/week for male). Hepatic steatosis was confirmed by vibration-controlled transient elastography (VCTE) generated controlled attenuation parameter (CAP) over 285 dB/m in 2017-2020 cycle, or abdominal ultrasounds determined mild, moderate or severe hepatic steatosis in NHANES Ⅲ, while for 1999-2018 cycle steatosis was diagnosed by U.S. Fatty Liver Index (USFLI) over 30 since the absence of VCTE and abdominal ultrasounds tests. Advanced liver fibrosis was diagnosed by VCTE generated liver stiffness measurement (LSM) over 13.1kPa in 2017-2020 cycle or fibrosis 4 (FIB-4) index over 2.67 in 1999-2018 cycle. Hepatitis B virus (HBV) exposure was determined by a positive antibody to hepatitis B core antigen (anti-HBc Ab), indicative of both current or previous HBV infection. The active HBV infection was determined by positive hepatitis B surface antigen (HBsAg). Hepatitis C patients were determined by presence of antibody to hepatitis C virus (anti-HCV Ab, indicating previous infection) and/or HCV RNA (indicating current infection). The detailed definitions for different cycles were presented as below:

| **Definition** | **Cycle** | **Definition** | **Analysis** |
| --- | --- | --- | --- |
| Hepatic steatosis (SLD, MASLD, MetALD, ALD) | NHANES Ⅲ | Abdominal ultrasounds determined mild, moderate or severe hepatic steatosis | Mortality |
| Hepatic steatosis (SLD, MASLD, MetALD, ALD) | NHANES 2017-2020 | CAP≥285 dB/m and 10 or more complete stiffness measurements, fasting time over 3 hours and IQR/M ≤30% | Contemporary prevalence, risk control (sensitive analysis) |
| Hepatic steatosis (SLD, MASLD, MetALD, ALD) | NHANES 1999-2020 | USFLI ≥30 | Prevalence change, mortality, risk control |
| Hepatic steatosis (SLD, MASLD, MetALD, ALD) | NHANES Ⅲ | USFLI ≥30 | Mortality (sensitive analysis) |
| SLD | NHANES Ⅲ, NHANES 1999-2020 | Hepatic steatosis (by ultrasounds or VCTE or USFLI) |  |
| MASLD | NHANES Ⅲ, NHANES 1999-2020 | Hepatic steatosis (by ultrasounds or VCTE or USFLI) + least one cardiometabolic risk factor (CMRF)#+ excluding significant alcohol consumption (≥ 140 g/week for women and ≥ 210 g/week for men) and other liver diseases |  |
| MetALD | NHANES Ⅲ, NHANES 1999-2020 | Hepatic steatosis (by ultrasounds or VCTE or USFLI) + least one cardiometabolic risk factor (CMRF)#+ moderate alcohol use (140 to 350 g/ week for females and 210 to 420 g/ week for males) |  |
| ALD | NHANES Ⅲ, NHANES 1999-2020 | Hepatic steatosis (by ultrasounds or VCTE or USFLI) + excessive alcohol use (≥350 g/ week for females and ≥ 420 g/ week for males) |  |
| Advanced liver fibrosis | NHANES 2017-2020 | LSM≥13.1kPa and 10 or more complete stiffness measurements, fasting time over 3 hours and IQR/M ≤30% | Contemporary prevalence |
| Advanced liver fibrosis | NHANES 1999-2018, NHANES Ⅲ | FIB-4 ≥ 2.67 | Prevalence change, mortality |
| HBV infection exposure | NHANES 1999-2020 | Positive anti-HBc Ab | Prevalence change |
| Active HBV infection | NHANES 1999-2020 | Positive HBsAg | Prevalence change |
| Hepatitis C | NHANES 1999-2020, NHANES Ⅲ | Positive anti-HCV Ab and/or HCV RNA | All |
| Viral hepatitis | NHANES 1999-2018, NHANES Ⅲ | Positive HBsAg or Positive anti-HCV Ab and/or HCV RNA. Including both active HBV infection and hepatitis C. | Mortality |

# Cardiometabolic risk factor (CMRF): (1) body mass index (BMI) ≥25 kg/m² or waist circumference over 94/80 cm (male/female); (2) fasting serum glucose level ≥ 5.6 mmol/L (100 mg/dL), hemoglobin A1c level ≥ 5.7% (39 mmol/L), type 2 diabetes, or have treatment for type 2 diabetes; (3) blood pressure ≥ 130/85 mmHg or have specific antihypertensive drug treatment; (4) plasma triglyceride level ≥ 1.70 mmol/L (150 mg/dL) or have lipid-lowering treatment; (5) plasma high-density lipoprotein-cholesterol ≤ 1.0 mmol/L (40 mg/dL, males) or ≤ 1.3 mmol/L (50 mg/dL, females) or have lipid-lowering treatment.

**Definition of covariates**

Covariates included age, sex (male or female), race (Mexican American or other Hispanic, non-Hispanic White, non-Hispanic NH Black, non-Hispanic Asian, other race- including multiracial), body mass index (BMI), education level (less than high school, high school, college or above), poverty income ratio (<1.3, 1.3-3.5, >3.5), marital status (married/ living with partner, never married, widowed/divorced/separated), insurance, smoking status (never, former, current), drinking status (drinker, non-drinker), history of diabetes, hypertension and cancer, alanine aminotransferase, total bilirubin, history of blood transfusion, hepatitis B vaccination. Time in US (<15 years, >15 years) were included in subgroup analyses.

**Outcomes**

The outcomes of interest included all-cause and cause-specific mortality. Mortality records through December 31, 2019, were obtained from the Centers for Disease Control and Prevention website, linked with the National Death Index by the National Center for Health Statistics(NCHS). Cause-specific mortality was determined using International Statistical Classification of Diseases, 10th Revision(ICD-10) codes. The NCHS classified cardiovascular mortality(heart disease: 54-68, cerebrovascular diseases: 70), cancer(19-43), diabetes(46), and other causes(010). Participants were followed from the date of survey until death or the end of follow-up, whichever occurred first.

**Join-point regression**

To estimate the trend of CLD, join-point regression with 4499 permutation tests based on the Monte Carlo method were performed and generated. The model allowed 1 join-point, with P for join-point > 0.05 indicating no turning point for prevalence change. Since the detection process was changed after 2013 in NHANES and the data restriction for anti-HCV Ab in cycle of 2015-2016, we only included cycles of 1999-2012 for trend analysis of hepatitis C.

**Supplementary Figure 1. Trends in immigration and corresponding characteristics in the United States during 1999-2020.**

**
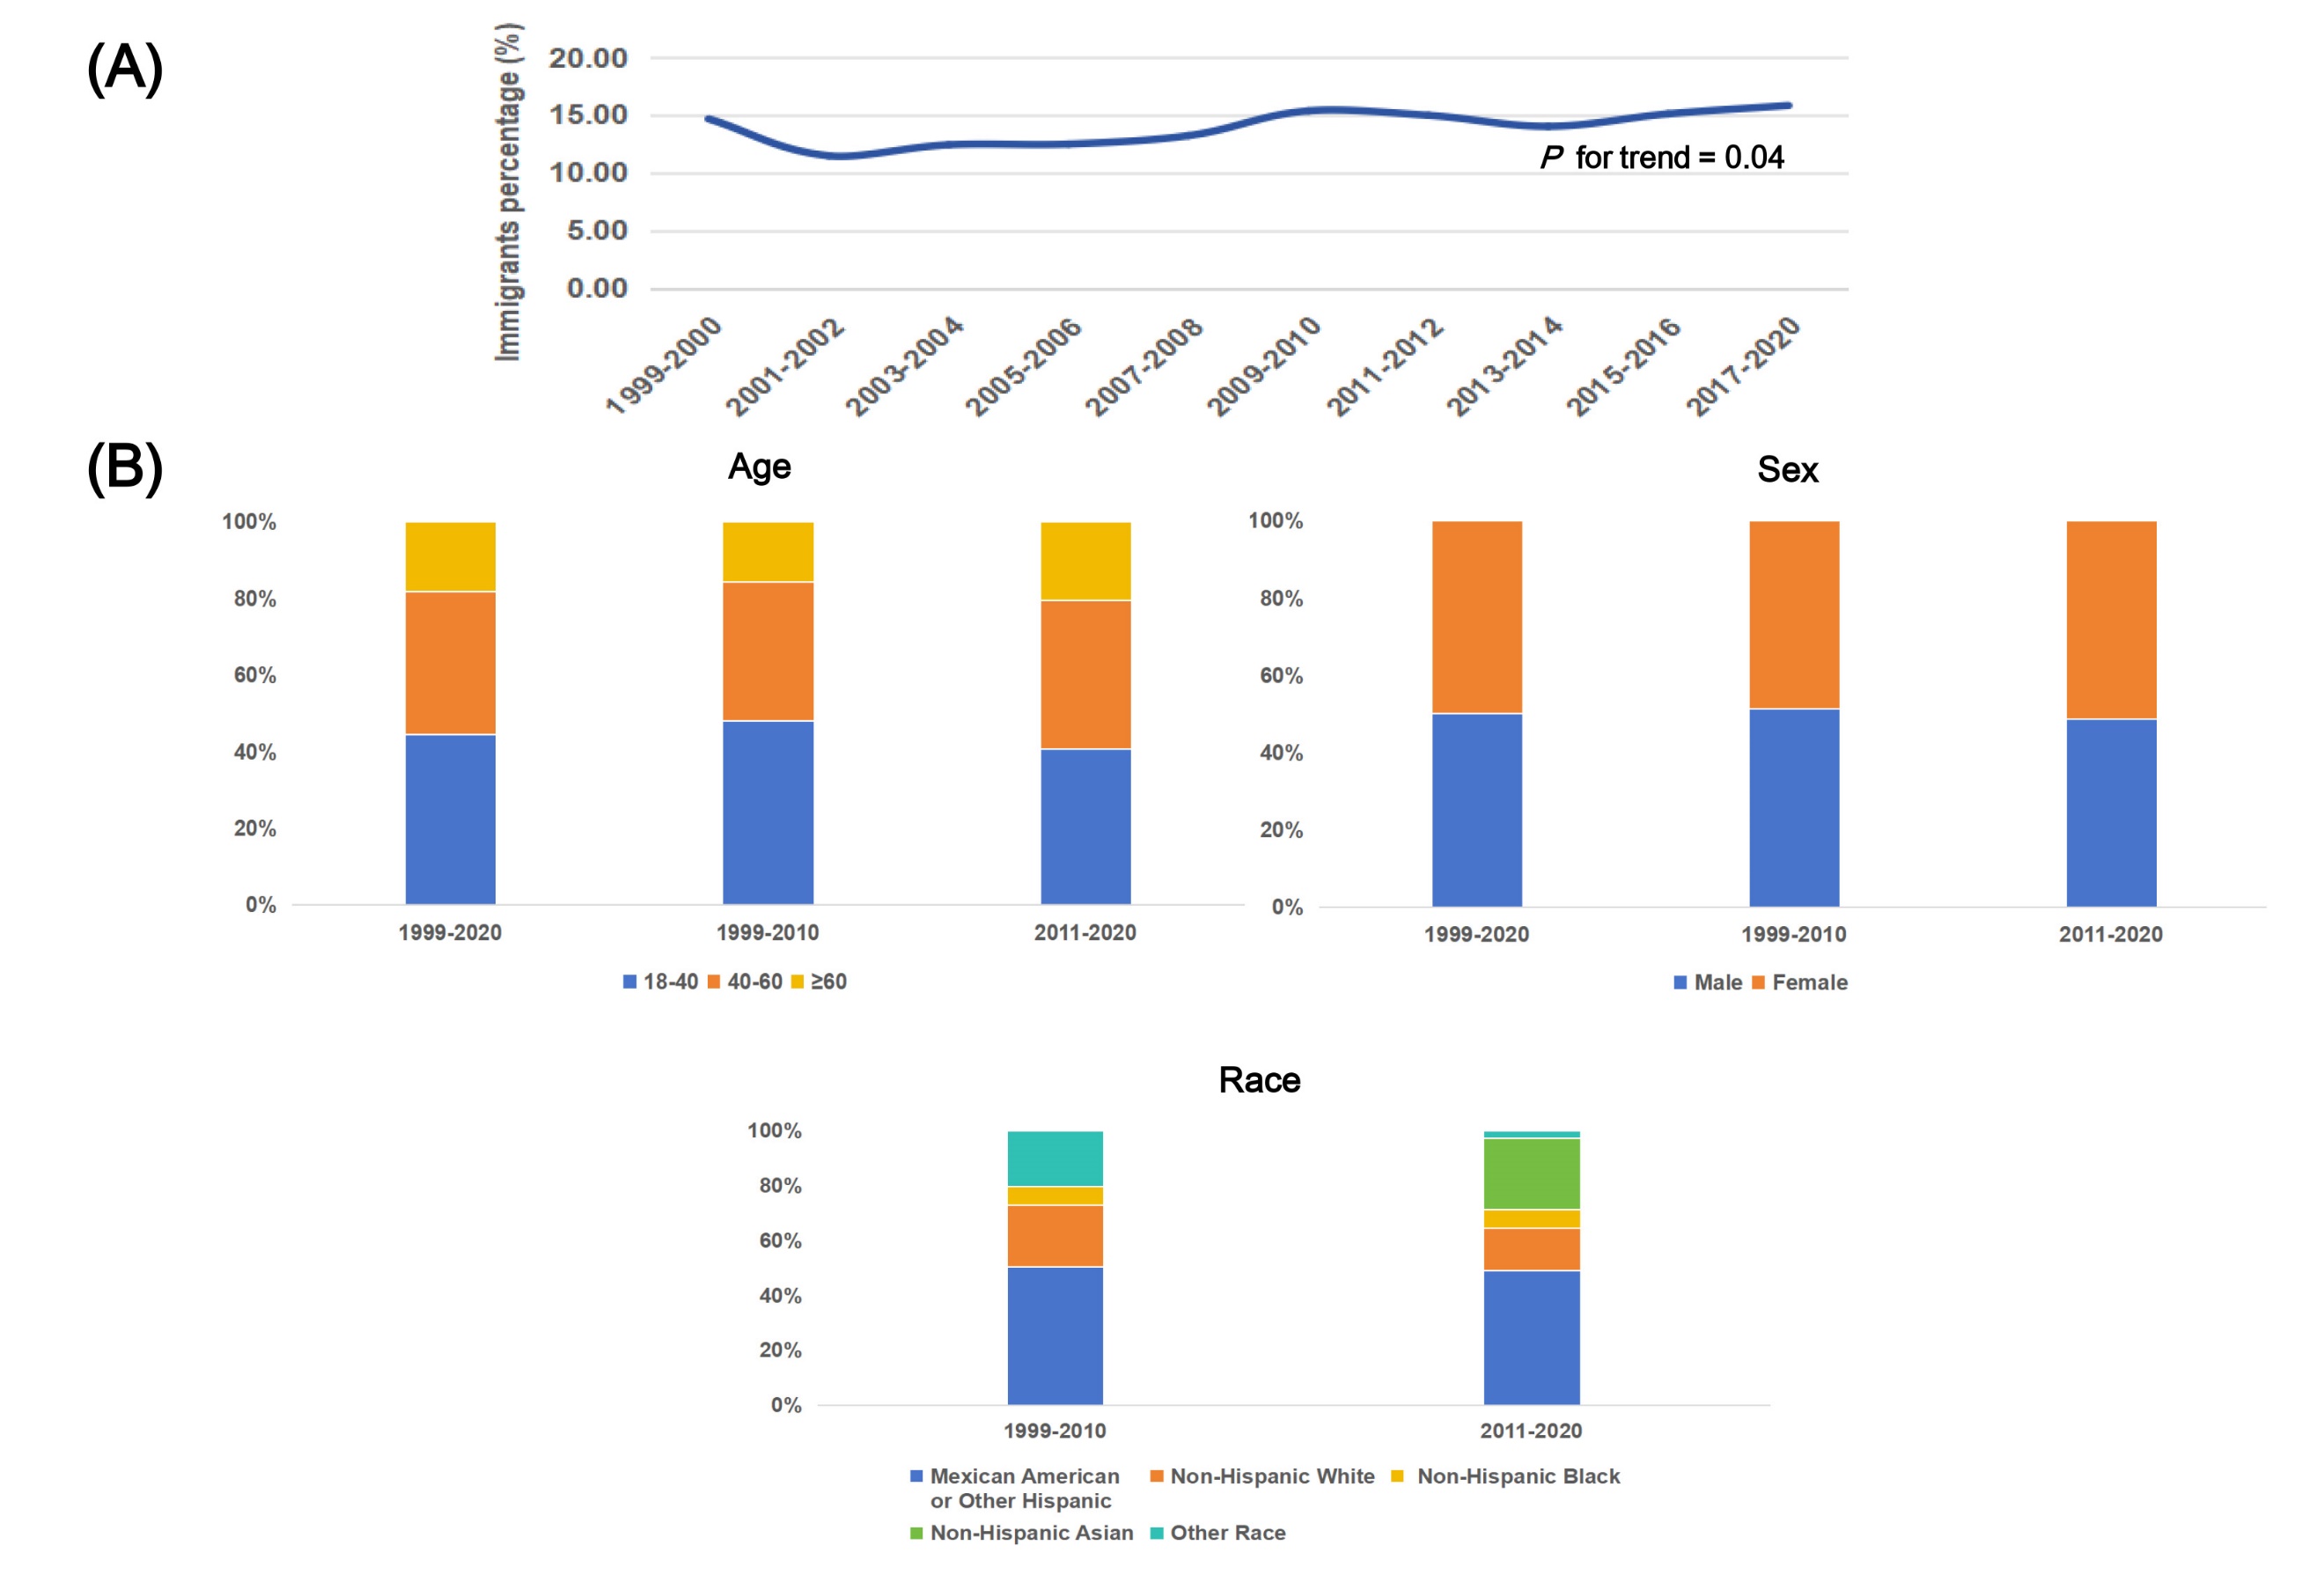
**

(A) Trends in immigration. (B) Characteristics of immigrants stratified by age, sex and race. Since year 2011, the race of non-Hispanic Asian, which was previously included in ‘Other Race’, was reported.

**Supplementary Figure 2. Trends of FIB-4 index in SLD individuals across nativity in the United States during 1999-2018.**

**
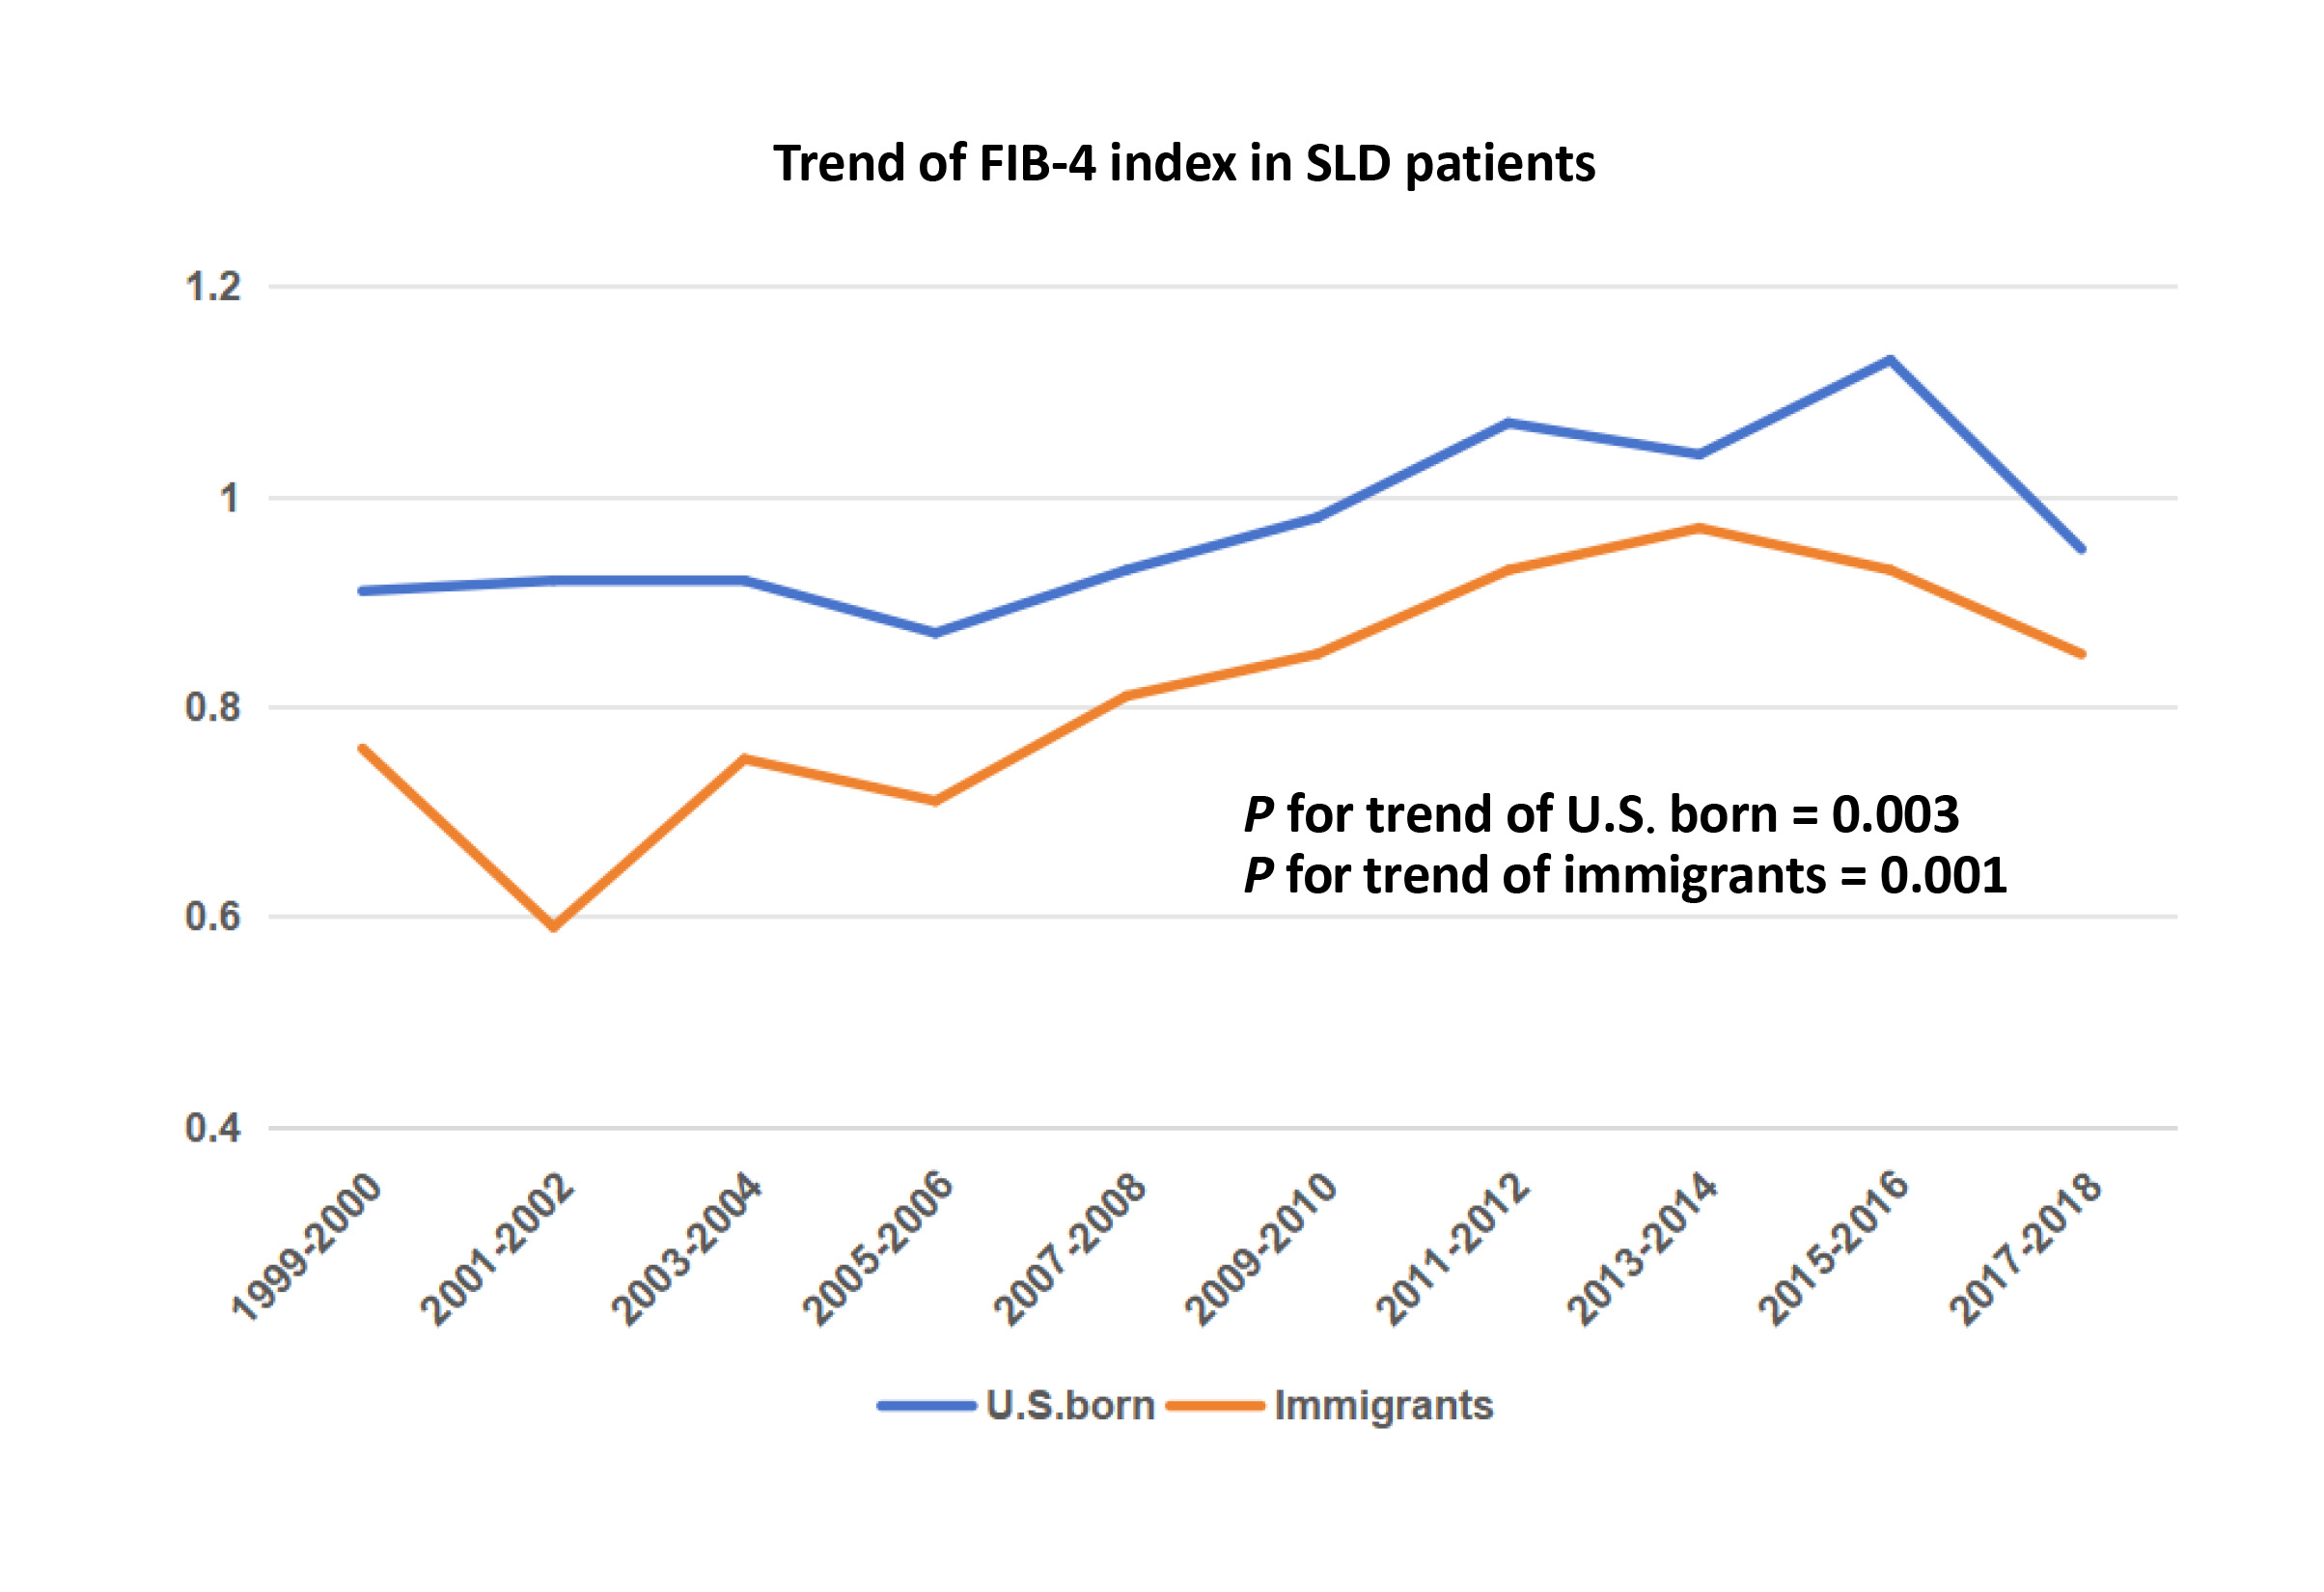
**

Abbreviations: FIB-4, fibrosis 4; SLD, steatotic liver disease; U.S., United States.

**Supplementary Table 1. Prevalence of chronic liver diseases among immigrants stratified by demographic characteristics (NHANES 2017-2020)**

| **Subgroups** | **SLD** | | **MASLD** | | **MetALD** | | **ALD** | | **Advanced liver fibrosis** | | **HBV exposure** | | **Active HBV infection** | | **Hepatitis C** | |
| --- | --- | --- | --- | --- | --- | --- | --- | --- | --- | --- | --- | --- | --- | --- | --- | --- |
| Age adjusted Prevalence (95% CI) | *P* value | Age adjusted Prevalence (95% CI) | *P* value | Age adjusted Prevalence (95% CI) | *P* value | Age adjusted Prevalence (95% CI) | *P* value | Age adjusted Prevalence (95% CI) | *P* value | Age adjusted Prevalence (95% CI) | *P* value | Age adjusted Prevalence (95% CI) | *P* value | Age adjusted Prevalence (95% CI) | *P* value |
| **Sex** |  | <0.001 |  | 0.008 |  | <0.001 |  | 0.034 |  | 0.098 |  | 0.043 |  | 0.682 |  | 0.048 |
| Male | 44.61(39.23,50.07) |  | 40.39(35.21,45.73) |  | 1.81(0.99,3.01) |  | 1.88(0.66,4.15) |  | 2.08(1.34,3.08) |  | 12.08(9.27,15.2) |  | 1.09(0.56,1.91) |  | 1.33(0.49,2.86) |  |
| Female | 32.26(27.70,37.08) |  | 31.62(27.10,36.42) |  | 0.11(0.00,0.64) |  | 0.25(0.02,0.98) |  | 1.23(0.66,2.10) |  | 8.79(7.12,10.71) |  | 0.93(0.50,1.60) |  | 0.29(0.09,0.69) |  |
| **Age** |  | 0.274 |  | 0.271 |  | 0.116 |  | 0.487 |  | <0.001 |  | <0.001 |  | 0.398 |  | 0.075 |
| 18-39 | 35.84(30.29,41.38) |  | 33.08(28.34,37.81) |  | 1.62(0.65,3.32) |  | 0.86(0.19,2.42) |  | 0.35(0.05,1.12) |  | 5.35(2.81,7.89) |  | 1.10(0.36,2.53) |  | 0.20(0.00,1.17) |  |
| 40–59 | 41.98(35.35,48.62) |  | 39.13(31.95,46.32) |  | 0.74(0.37,1.31) |  | 1.59(0.26,4.99) |  | 1.85(0.94,3.25) |  | 10.21(7.39,13.02) |  | 0.73(0.45,1.11) |  | 1.24(0.32,3.21) |  |
| ≥60 | 38.19(32.83,43.55) |  | 36.68(31.23,42.13) |  | 0.36(0.00,1.38) |  | 0.58(0.05,2.31) |  | 3.59 (2.10,5.71) |  | 20.14(15.63,24.65) |  | 1.31(0.77,2.07) |  | 1.17(0.47,2.39) |  |
| **Race#** |  | <0.001 |  | <0.001 |  | 0.016 |  | 0.873 |  | 0.017 |  | <0.001 |  | <0.001 |  | 0.563 |
| Mexican American  or Other Hispanic | 45.35(40.76,50.01) |  | 41.95(37.71 46.28) |  | 1.68(0.90,2.84) |  | 1.49(0.65,2.90) |  | 2.35(1.45,3.57) |  | 5.29(3.73,7.06) |  | 0.30(0.07,0.79) |  | 1.21(0.45 2.61) |  |
| Non-Hispanic White | 32.41(20.58,46.16) |  | 30.65(18.15,45.64) |  | / |  | 1.76(0.05,9.29) |  | 0.62(0.03,2.98) |  | 6.90(2.10,16.01) |  | 0.57(0.01,3.65) |  | / |  |
| Non-Hispanic Black | 24.59(16.67,34.01) |  | 23.82(15.66,33.68) |  | / |  | / |  | 0.42(0.00,2.70) |  | 21.20(15.12,28.39) |  | 2.21(0.53,5.94) |  | / |  |
| Non-Hispanic Asian | 32.32(28.29,36.56) |  | 30.83(26.70,35.20) |  | 0.48( 0.11,1.32) |  | / |  | 1.15(0.52,2.19) |  | 20.93(17.89,24.24) |  | 2.43(1.60,3.55) |  | 0.86(0.26,2.10) |  |
| **Education level** |  | 0.344 |  | 0.709 |  | 0.093 |  | 0.101 |  | 0.263 |  | 0.597 |  | 0.745 |  | 0.155 |
| Less than high school | 40.48(34.95,46.18) |  | 35.96(29.80,42.47) |  | 2.20(0.80,4.75) |  | 2.19(0.41,6.52) |  | 1.29(0.68,2.22) |  | 11.43(8.99,14.25) |  | 0.91(0.22,2.43) |  | 0.74(0.25,1.69) |  |
| High school | 42.47(33.7,51.61) |  | 38.87(30.90,47.30) |  | 1.41(0.33,3.85) |  | 1.61(0.44,4.10) |  | 2.59(1.30,4.56) |  | 10.74(7.74,14.39) |  | 0.84(0.26,1.97) |  | 1.83(0.49,4.64) |  |
| College or above | 36.48(31.63,41.55) |  | 35.15(30.32,40.21) |  | 0.53(0.12,1.14) |  | 0.31(0.02,1.31) |  | 1.40(0.64,2.62) |  | 9.72(7.45,12.41) |  | 1.19(0.62,2.05) |  | 0.34(0.07,0.98) |  |
| **Poverty income ratio** | | 0.364 |  | 0.744 |  | 0.412 |  | 0.281 |  | 0.204 |  | 0.921 |  | 0.874 |  | 0.041 |
| <1.3 | 39.53(33.43,45.87) |  | 37.31(31.05,43.89) |  | 0.69(0.11,2.24) |  | 1.22(0.32,3.17) |  | 2.45(1.23,4.35) |  | 10.02(7.40,13.17) |  | 0.89(0.28,2.11) |  | 1.40(0.23,4.44) |  |
| 1.3-3.5 | 41.22(34.67,48.00) |  | 36.38(30.06,43.07) |  | 1.68( 0.61,3.66) |  | 2.72(0.76,6.74) |  | 2.28(1.17,3.96) |  | 10.15(7.68,13.08) |  | 0.90(0.31,2.02) |  | 0.61(0.19,1.47) |  |
| >=3.5 | 35.36(29.33,41.75) |  | 34.14(28.02,40.67) |  | 0.78(0.24,1.86) |  | / |  | 0.76(0.28,1.63) |  | 10.91(7.41,15.34) |  | 1.15(0.47,2.36) |  | 0.06(0.00,0.35) |  |
| **Insurance** |  | 0.665 |  | 0.911 |  | 0.457 |  | 0.214 |  | 0.93 |  | 0.882 |  | 0.937 |  | 0.442 |
| No | 39.37(33.43,45.54) |  | 35.48(30.15,41.09) |  | 1.30(0.56,2.55) |  | 1.70(0.60,3.75) |  | 1.51(0.66,2.93) |  | 10.94(6.37,17.17) |  | 1.06(0.22,3.10) |  | 1.15(0.15,4.00) |  |
| Yes | 37.84(33.54,42.29) |  | 35.85(31.62,40.25) |  | 0.90(0.38,1.82) |  | 0.69(0.09,2.42) |  | 1.46(0.94,2.16) |  | 10.55(8.66,12.68) |  | 1.11(0.64,1.78) |  | 0.56(0.28,1.00) |  |

#Other Race was not reported due to too little sample size

Abbreviations: ALD, alcoholic liver disease; CI, confidence intervals; HBV, hepatitis B virus; MASLD, metabolic dysfunction-associated steatotic liver disease; MetALD, metabolic and alcohol related/associated liver disease; NHANES, National Health and Nutrition Examination Survey; SLD, steatotic liver disease.

**Supplementary Table 2. Prevalence of chronic liver diseases among immigrants stratified by duration in the United States (NHANES 2017-2020)**

| **Chronic liver disease** | **Duration in U.S < 15years** | **Duration in U.S >15 years** | ***P* value** |
| --- | --- | --- | --- |
| Age adjusted Prevalence (95% CI) | Age adjusted Prevalence (95% CI) |
| SLD | 36.11(28.82,43.9) | 42.54( 37.91,47.26) | 0.122 |
| MASLD | 34.22(26.81,42.24) | 39.83(35.26,44.54) | 0.184 |
| MetALD | 0.58(0.12,1.73) | 1.27(0.51,2.58) | 0.213 |
| ALD | 0.41(0.01,2.5) | 1.17(0.36,2.77) | 0.248 |
| HBV exposure | 14.62(11.34,18.42) | 9.68(7.14,12.74) | 0.019 |
| Active HBV infection | 1.85(0.89,3.4) | 0.83(0.38,1.59) | 0.098 |
| Hepatitis C | 0.96(0.04,4.63) | 0.77(0.32,1.54) | 0.826 |
| Advanced liver fibrosis | 0.63(0.13,1.83) | 2.01(1.31,2.94) | 0.006 |

Abbreviations: ALD, alcoholic liver disease; CI, confidence intervals; HBV, hepatitis B virus; MASLD, metabolic dysfunction-associated steatotic liver disease; MetALD, metabolic and alcohol related/associated liver disease; NHANES,National Health and Nutrition Examination Survey; SLD, steatotic liver disease.

**Supplementary Table 3. Risk factor contributing to chronic liver diseases among immigrants (NHANES 2017-2020)**

| **Risk factors** | **SLD** | | | **MASLD** | | | **Risk factors** | **HBV exposure** | | |
| --- | --- | --- | --- | --- | --- | --- | --- | --- | --- | --- |
| OR | 95%CI | *P* value | OR | 95%CI | *P* value | OR | 95%CI | *P* value |
| **Sex** |  |  |  |  |  |  | **Sex** |  |  |  |
| Female | ref |  |  | ref |  |  | Female | ref | ref | ref |
| Male | 1.98 | 1.32, 2.95 | 0.007 | 1.74 | 1.19, 2.57 | 0.014 | Male | 1.94 | 1.25, 3.03 | 0.012 |
| **Age** | 0.99 | 0.98, 1.01 | 0.359 | 0.99 | 0.98, 1.01 | 0.389 | **Age** | 1.05 | 1.03, 1.06 | <0.001 |
| **BMI** | 1.24 | 1.18, 1.30 | <0.001 | 1.21 | 1.16, 1.27 | <0.001 | **BMI** | 0.96 | 0.91, 1.01 | 0.105 |
| **Race** |  |  |  |  |  |  | **Race** |  |  |  |
| Mexican or other Hispanic | ref |  |  | ref |  |  | Mexican or other Hispanic | ref |  |  |
| Non-Hispanic White | 0.54 | 0.22, 1.31 | 0.134 | 0.54 | 0.20, 1.42 | 0.16 | Non-Hispanic White | 1.73 | 0.37, 8.01 | 0.4 |
| Non-Hispanic Black | 0.33 | 0.17, 0.66 | 0.009 | 0.35 | 0.18, 0.69 | 0.011 | Non-Hispanic Black | 6.81 | 2.67, 17.4 | 0.003 |
| Non-Hispanic Asian | 1.01 | 0.66, 1.55 | 0.958 | 0.93 | 0.60, 1.44 | 0.687 | Non-Hispanic Asian | 5.99 | 2.57, 14.0 | 0.003 |
| Other Race | 0.65 | 0.21, 2.06 | 0.383 | 0.69 | 0.20, 2.34 | 0.473 | Other Race | 1.08 | 0.10, 11.6 | 0.936 |
| **Smoking status** |  |  |  |  |  |  | **Smoking status** |  |  |  |
| Never | ref |  |  | ref |  |  | Never | ref |  |  |
| Former | 0.84 | 0.49, 1.44 | 0.446 | 0.81 | 0.50, 1.32 | 0.326 | Former | 0.78 | 0.48, 1.26 | 0.239 |
| Current | 1.82 | 0.90, 3.69 | 0.082 | 1.34 | 0.57, 3.17 | 0.42 | Current | 1.23 | 0.41, 3.71 | 0.654 |
| **Drinking status** |  |  |  |  |  |  | **Drinking status** |  |  |  |
| Drinker | ref | ref |  | ref |  |  | Drinker | ref |  |  |
| Non-drinker | 1.02 | 0.74, 1.40 | 0.904 | 0.87 | 0.63, 1.19 | 0.301 | Non-drinker | 0.92 | 0.52, 1.62 | 0.718 |
| **Poverty income ratio** |  |  |  |  |  |  | **Poverty income ratio** |  |  |  |
| <1.3 | ref |  |  | ref |  |  | <1.3 | ref |  |  |
| 1.3-3.5 | 1.09 | 0.60, 1.97 | 0.723 | 0.91 | 0.54, 1.53 | 0.657 | 1.3-3.5 | 0.97 | 0.49, 1.95 | 0.924 |
| ≥3.5 | 1.07 | 0.57, 2.01 | 0.787 | 1.02 | 0.56, 1.86 | 0.925 | ≥3.5 | 0.95 | 0.35, 2.60 | 0.907 |
| **Education level** |  |  |  |  |  |  | **Education level** |  |  |  |
| Less than high school | ref |  |  | ref |  |  | Less than high school | ref |  |  |
| High school graduate | 1.29 | 0.89, 1.86 | 0.136 | 1.36 | 0.94, 1.97 | 0.086 | High school graduate | 0.69 | 0.31, 1.56 | 0.295 |
| College or above | 1.28 | 0.80, 2.05 | 0.23 | 1.5 | 0.84, 2.69 | 0.13 | College or above | 0.44 | 0.22, 0.87 | 0.027 |
| **Insurance** |  |  |  |  |  |  | **Insurance** |  |  |  |
| No | ref |  |  | ref |  |  | No | ref | ref | ref |
| Yes | 1.16 | 0.76, 1.77 | 0.417 | 1.2 | 0.82, 1.77 | 0.273 | Yes | 0.69 | 0.33, 1.46 | 0.261 |
| **Marrige status** |  |  |  |  |  |  | **Marrige status** |  |  |  |
| Married | ref |  |  | ref |  |  | Married | ref | ref | ref |
| Divorced | 0.79 | 0.45, 1.39 | 0.335 | 0.82 | 0.50, 1.34 | 0.343 | Divorced | 0.69 | 0.44, 1.10 | 0.099 |
| Never married | 0.91 | 0.54, 1.53 | 0.655 | 0.99 | 0.58, 1.67 | 0.955 | Never married | 0.83 | 0.38, 1.82 | 0.572 |
| **Hypertension** |  |  |  |  |  |  | **Vaccine** |  |  |  |
| No | ref |  |  | ref |  |  | No | ref | ref | ref |
| Yes | 1.53 | 1.11, 2.11 | 0.019 | 1.68 | 1.24, 2.28 | 0.007 | Yes | 0.83 | 0.38, 1.81 | 0.562 |
| **Diabetes** |  |  |  |  |  |  | **Blood transfusion** |  |  |  |
| No | ref |  |  | ref |  |  | No | ref | ref | ref |
| Yes | 3.63 | 2.57, 5.14 | <0.001 | 3.17 | 2.22, 4.54 | <0.001 | Yes | 1.33 | 0.63, 2.81 | 0.371 |

Abbreviations: BMI, body mass index; CI, confidence intervals; HBV, hepatitis B virus; MASLD, metabolic dysfunction-associated steatotic liver disease; OR, odds ratio; SLD, steatotic liver disease; NHANES, National Health and Nutrition Examination Survey; U.S, United States.

**Supplementary Table 4. All-cause or cause-specific mortality across nativity (NHANES 1999-2018)**

| **Mortality** | **U.S.-born** | **Immigrants** | ***P* value** |
| --- | --- | --- | --- |
| Age adjusted mortality (95% CI) | Age adjusted mortality (95% CI) |
| **All cause** |  |  |  |
| SLD | 10.51(9.53,11.56) | 7.30(5.88,8.93) | <0.001 |
| MASLD | 9.70(8.75,10.71) | 7.25(5.81,8.92) | 0.006 |
| MetALD | 13.14(8.54,19.02) | 15.23(2.36,42.51) | 0.769 |
| ALD | 26.69(16.06,39.74) | 2.32(0.01,15.54) | <0.001 |
| Viral hepatitis | 18.96(15.49,22.82) | 7.20(4.40,10.99) | <0.001 |
| Advanced liver fibrosis | 24.57(18.50,31.49) | 14.44(5.93,27.72) | 0.048 |
| **Cardiovascular diseases** |  |  |  |
| SLD | 3.00(2.52,3.53) | 2.74(1.74,4.08) | 0.67 |
| MASLD | 2.90(2.41,3.45) | 2.69(1.68,4.07) | 0.736 |
| MetALD | 3.36(1.64,6.03) | 4.93(0.07,27.07) | 0.687 |
| ALD | 4.04(0.93,10.88) | 2.32(0.01,15.54) | 0.571 |
| Viral hepatitis | 3.29(1.97,5.13) | 2.12(0.53,5.56) | 0.369 |
| Advanced liver fibrosis | 4.84(4.16,5.59) | 3.00(2.04,4.24) | 0.003 |
| **Cancer** |  |  |  |
| SLD | 2.48(2.03,3.00) | 1.62(0.94,2.59) | 0.06 |
| MASLD | 2.16(1.72,2.67) | 1.53(0.93,2.36) | 0.125 |
| MetALD | 3.99(2.01,7.03) | 9.68(0.56,37.17) | 0.328 |
| Viral hepatitis | 4.15(2.81,5.89) | 1.02(0.25,2.73) | <0.001 |
| Advanced liver fibrosis | 6.11(3.90,9.04) | 1.31(0.57,2.54) | <0.001 |
| **T2D#** |  |  |  |
| SLD | 0.75(0.50,1.08) | 0.32(0.07,0.92) | 0.058 |
| MASLD | 0.80(0.53,1.16) | 0.34(0.07,0.99) | 0.061 |
| **Other cause** |  |  |  |
| SLD | 2.52(2.10,3.00) | 1.62(1.08,2.33) | 0.016 |
| MASLD | 2.31(1.86,2.78) | 1.63(1.08,2.38) | 0.045 |
| MetALD | 2.91(1.55,4.93) | 0.63(0.00,6.14) | 0.026 |
| Viral hepatitis | 5.54(3.90,7.59) | 3.42(1.58,6.38) | 0.131 |
| Advanced liver fibrosis | 10.80(5.70,18.10) | 8.59(1.57,24.35) | 0.699 |

Abbreviations: CI, confidence intervals; NHANES, National Health and Nutrition Examination Survey; T2D, type 2 diabetes; U.S., United States.

**Supplementary Table 5. Association between nativity and risk of all-cause or cause-specific mortality among participants with CLD (NHANES Ⅲ, hepatic steatosis diagnosed by ultrasound)**

| **Mortality** | **NHANES Ⅲ (diagnosed by ultrasound)** | | | | | | | | |
| --- | --- | --- | --- | --- | --- | --- | --- | --- | --- |
| Model 1 | | | Model 2 | | | Model 3 | | |
| aHR | 95%CI | *P* value | aHR | 95%CI | *P* value | aHR | 95%CI | *P* value |
| **All cause** |  |  |  |  |  |  |  |  |  |
| SLD | 0.57 | 0.44,0.75 | <0.001 | 0.64 | 0.48,0.86 | 0.002 | 0.67 | 0.51,0.89 | 0.005 |
| MASLD | 0.54 | 0.41,0.71 | <0.001 | 0.66 | 0.47,0.91 | 0.013 | 0.68 | 0.49,0.94 | 0.012 |
| MetALD | 0.86 | 0.29,2.52 | 0.79 |  | | | | | |
| ALD | 0.94 | 0.36,2.42 | 0.9 |  | | | | | |
| Viral hepatitis | 0.72 | 0.42,1.23 | 0.237 | 0.48 | 0.21,1.08 | 0.078 |  |  |  |
| Advanced liver fibrosis | 0.62 | 0.46,0.84 | 0.002 | 0.97 | 0.41,2.24 | 0.943 | 1.00 | 0.44,2.28 | 0.981 |
| **Cardiovascular diseases** |  |  |  |  |  |  |  |  |  |
| SLD | 0.49 | 0.29,0.82 | 0.007 | 0.52 | 0.29,0.94 | 0.031 | 0.55 | 0.31,0.99 | 0.048 |
| MASLD | 0.41 | 0.25,0.70 | <0.001 | 0.51 | 0.27,0.97 | 0.042 | 0.54 | 0.28,1.02 | 0.058 |
| Viral hepatitis | 0.51 | 0.13,2.02 | 0.343 |  | | | | | |
| Advanced liver fibrosis | 0.58 | 0.28,1.20 | 0.145 | 1.32 | 0.33,5.22 | 0.345 | 1.37 | 0.55,3.39 | 0.494 |
| **Cancer** |  |  |  |  |  |  |  |  |  |
| SLD | 0.42 | 0.26,0.69 | <0.001 | 0.49 | 0.28,0.85 | 0.011 | 0.51 | 0.29,0.87 | 0.014 |
| MASLD | 0.43 | 0.24,0.756 | 0.003 | 0.49 | 0.26,0.92 | 0.0281 | 0.51 | 0.27,0.93 | 0.029 |
| Viral hepatitis | 0.21 | 0.05,0.83 | 0.026 |  | | | | | |
| Advanced liver fibrosis | 0.19 | 0.01,2.98 | 0.241 |  | | | | | |
| **T2D1** |  |  |  |  |  |  |  |  |  |
| SLD | 0.36 | 0.15,0.87 | 0.023 | 0.45 | 0.26,0.79 | 0.005 |  |  |  |
| MASLD | 0.34 | 0.14,0.85 | 0.022 | 0.45 | 0.26,0.78 | 0.004 |  |  |  |
| **Other cause** |  |  |  |  |  |  |  |  |  |
| SLD | 0.73 | 0.54,0.99 | 0.048 | 0.77 | 0.39,1.52 | 0.462 | 0.81 | 0.41,1.64 | 0.567 |
| MASLD | 0.71 | 0.49,1.03 | 0.07 | 0.86 | 0.39,1.89 | 0.724 | 0.91 | 0.40,2.06 | 0.829 |
| Viral hepatitis | 1.37 | 0.65,2.90 | 0.404 |  |  |  |  |  |  |
| Advanced liver fibrosis | 1.08 | 0.56,2.07 | 0.809 | 1.11 | 0.12,9.54 | 0.924 |  |  |  |

Model 1 was unadjusted; Model 2 adjusted for age, sex, race, BMI, smoking status, drinking status, education level, marriage; Model 3 adjusted for model 2 covariates plus history of cancer, hypertension, diabetes, alanine aminotransferase, total bilirubin (HBV vaccine were further adjusted in context of HBV). The aHRs were estimated by setting U.S born participants as reference.

#Mortalities due to T2D were only estimated in model 1 and model 2 since limited sample size, and model 2 for T2D mortality only adjusted for age, sex, race and BMI.

Abbreviations: ALD, alcoholic liver disease; BMI, body mass index; CI, confidence intervals; CVD, cardiovascular diseases; aHR, adjusted hazard ratio; MASLD, metabolic dysfunction-associated steatotic liver disease; MetALD, metabolic and alcohol related/associated liver disease; NHANES, National Health and Nutrition Examination Survey; SLD, steatotic liver disease; T2D, type 2 diabetes; U.S, United States.

**Supplementary Table 6. Association between nativity and risk of all-cause or specific-cause mortality among participants with CLD (NHANES Ⅲ, diagnosed by USFLI)**

| **Mortality** | **NHANES Ⅲ (diagnosed by USFLI)** | | | | | | | | |
| --- | --- | --- | --- | --- | --- | --- | --- | --- | --- |
| Model 1 | | | Model 2 | | | Model 3 | | |
| aHR | 95%CI | *P* value | aHR | 95%CI | *P* value | aHR | 95%CI | *P* value |
| **All cause** |  |  |  |  |  |  |  |  |  |
| SLD(3045) | 0.55 | 0.43,0.71 | <0.001 | 0.69 | 0.52,0.91 | 0.008 | 0.71 | 0.54,0.93 | 0.013 |
| MASLD(2767) | 0.51 | 0.41,0.65 | <0.001 | 0.67 | 0.49,0.91 | 0.011 | 0.68 | 0.51,0.92 | 0.013 |
| MetALD(138) | 0.76 | 0.26,2.21 | 0.620 |  |  |  |  |  |  |
| ALD(49) | 1.14 | 0.51,2.57 | 0.740 |  |  |  |  |  |  |
| **CVD** |  |  |  |  |  |  |  |  |  |
| SLD | 0.54 | 0.36,0.81 | 0.003 | 0.75 | 0.46,1.21 | 0.241 | 0.77 | 0.47,1.26 | 0.308 |
| MASLD | 0.46 | 0.32,0.65 | <0.001 | 0.73 | 0.43,1.23 | 0.241 | 0.71 | 0.43,1.28 | 0.288 |
| **Cancer** |  |  |  |  |  |  |  |  |  |
| SLD | 0.57 | 0.36,0.91 | 0.02 | 0.56 | 0.33,0.95 | 0.033 | 0.61 | 0.36,1.01 | 0.058 |
| MASLD | 0.61 | 0.36，0.99 | 0.05 | 0.53 | 0.31,0.91 | 0.022 | 0.58 | 0.34,0.97 | 0.037 |
| **T2D1** |  |  |  |  |  |  |  |  |  |
| SLD | 0.18 | 0.06,0.54 | 0.002 | 0.32 | 0.16,0.64 | 0.001 |  |  |  |
| MASLD | 0.19 | 0.06,0.61 | 0.005 | 0.33 | 0.16,0.67 | 0.002 |  |  |  |
| **Other cause** |  |  |  |  |  |  |  |  |  |
| SLD | 0.65 | 0.40,1.06 | 0.084 | 0.71 | 0.37,1.33 | 0.286 | 0.75 | 0.38,1.48 | 0.421 |
| MASLD | 0.58 | 0.37,0.91 | 0.019 | 0.67 | 0.33,1.38 | 0.285 | 0.71 | 0.34,1.49 | 0.371 |

Model 1 was unadjusted; Model 2 adjusted for age, sex, race, BMI, smoking status, drinking status, education level, marriage; Model 3 adjusted for model 2 covariates plus history of cancer, hypertension, diabetes, alanine aminotransferase, total bilirubin. The aHRs were estimated by setting U.S born participants as reference.

#Mortalities due to T2D were only estimated in model 1 and model 2 since limited sample size, and model 2 for T2D mortality only adjusted for age, sex, race and BMI.

Abbreviations: ALD, alcoholic liver disease; BMI, body mass index; CI, confidence intervals; CVD, cardiovascular diseases; aHR, adjusted hazard ratio; MASLD, metabolic dysfunction-associated steatotic liver disease; MetALD, metabolic and alcohol related/associated liver disease; NHANES, National Health and Nutrition Examination Survey; SLD, steatotic liver disease; T2D, type 2 diabetes; U.S, United States.

**Supplementary Table 7. Association between nativity and risk of specific-cause mortality among participants with chronic liver disease in Fine-Gray competing risk models.**

| **Mortality** | **NHANES 1999-2018** | | | **NHANES Ⅲ** | | |
| --- | --- | --- | --- | --- | --- | --- |
| aHR | 95%CI | *P* value | aHR | 95%CI | *P* value |
| **CVD** |  |  |  |  |  |  |
| SLD | 0.95 | 0.64,1.41 | 0.800 | 0.54 | 0.39,0.74 | <0.001 |
| MASLD | 0.96 | 0.64,1.45 | 0.870 | 0.53 | 0.37,0.74 | <0.001 |
| Advanced liver fibrosis | 0.91 | 0.61,1.33 | 0.620 | 0.95 | 0.57,1.60 | 0.87 |
| Viral hepatitis* | 0.57 | 0.22,1.48 | 0.250 | 0.49 | 0.20,1.24 | 0.13 |
| **Cancer** |  |  |  |  |  |  |
| SLD | 0.71 | 0.47,1.09 | 0.120 | 0.82 | 0.61,1.12 | 0.22 |
| MASLD | 0.81 | 0.51,1.27 | 0.360 | 0.83 | 0.60,1.15 | 0.26 |
| Advanced liver fibrosis | 0.64 | 0.35,1.16 | 0.150 | 0.56 | 0.20,1.57 | 0.27 |
| Viral hepatitis* | 0.3 | 0.11,0.83 | 0.021 | 0.54 | 0.21,1.36 | 0.19 |
| **T2D#** |  |  |  |  |  |  |
| SLD | 0.35 | 0.14,0.85 | 0.020 | 0.72 | 0.43,1.23 | 0.24 |
| MASLD | 0.33 | 0.13,0.83 | 0.018 | 0.71 | 0.39,1.24 | 0.22 |
| Advanced liver fibrosis | 1.24 | 0.34,4.44 | 0.740 | / | | |
| **Otherdeath** |  |  |  |  |  |  |
| SLD | 0.56 | 0.37,0.87 | 0.010 | 0.86 | 0.63,1.17 | 0.34 |
| MASLD | 0.55 | 0.35,0.87 | 0.010 | 0.96 | 0.69,1.34 | 0.830 |
| Advanced liver fibrosis | 0.5 | 0.31,0.79 | 0.003 | 0.89 | 0.49,1.61 | 0.71 |
| Viral hepatitis | 0.75 | 0.41,1.4 | 0.370 | 1.09 | 0.61,1.95 | 0.78 |

Model was adjusted for age, sex, race, BMI, smoking status, drinking status, education level, marriage, history of cancer, hypertension, diabetes, alanine aminotransferase, total bilirubin. The aHRs were estimated by setting U.S born participants as reference. Fine-Grey model were conducted for cause-specific mortality by considering deaths by other categories as competing incidences.

# Due to limited sample size, Mortality due to T2D were only adjusted for age, sex, race and BMI for SLD and MASLD, while no covariate was adjusted for advanced liver fibrosis

* no covariate was adjusted for viral hepatitis

Abbreviations: BMI, body mass index; CI, confidence intervals; CVD, cardiovascular diseases; aHR, adjusted hazard ratio; MASLD, metabolic dysfunction-associated steatotic liver disease; NHANES, National Health and Nutrition Examination Survey; SLD, steatotic liver disease; T2D, type 2 diabetes; U.S, United States.

**Supplementary Table 8. Association between nativity and risk of all-cause mortality among participants with chronic liver disease across age, sex, race, BMI categories (NHANES 1999-2018)**

| **Subgroup** | **SLD** | | | **MASLD** | | | **Advanced liver fibrosis#** | | |
| --- | --- | --- | --- | --- | --- | --- | --- | --- | --- |
| aHR | 95%CI | *P* for interaction | aHR | 95%CI | *P* for interaction | aHR | 95%CI | *P* for interaction |
| **All-cause mortality** |  |  |  |  |  |  |  |  |  |
| **Age** |  |  | 0.034 |  |  | 0.133 |  |  | 0.06 |
| <55 | 0.36 | 0.18,0.71 |  | 0.47 | 0.26,0.86 |  | 0.28 | 0.17,0.48 |  |
| >55 | 0.81 | 0.55,1.21 |  | 1.01 | 0.70,1.46 |  | 0.84 | 0.61,1.16 |  |
| **Sex** |  |  | 0.512 |  |  | 0.695 |  |  | 0.411 |
| Male | 0.65 | 0.43,1.00 |  | 0.74 | 0.48,1.13 |  | 0.54 | 0.36,0.81 |  |
| Female | 0.65 | 0.39,1.09 |  | 0.66 | 0.38,1.13 |  | 0.43 | 0.26,0.69 |  |
| **Race** |  |  | 0.101 |  |  | 0.082 |  |  | 0.013 |
| Mexican American  or Other Hispanic | 0.6 | 0.40,0.91 |  | 0.7 | 0.44,1.09 |  | 0.33 | 0.21,0.51 |  |
| Non-Hispanic White | 0.98 | 0.68,1.39 |  | 1.06 | 0.71,1.57 |  | 0.8 | 0.52,1.21 |  |
| Non-Hispanic Black | 0.9 | 0.23,3.54 |  | 0.9 | 0.23,3.83 |  | 0.06 | 0.01,0.44 |  |
| Other Race | 0.17 | 0.06,0.54 |  | 0.4 | 0.17,0.93 |  | 0.33 | 0.11,0.96 |  |
| **BMI** |  |  | <0.001 |  |  | 0.001 |  |  | 0.038 |
| <30 | 0.4 | 0.23,0.69 |  | 0.42 | 0.23,0.77 |  | 0.46 | 0.33,0.65 |  |
| ≥30 | 0.96 | 0.64,1.43 |  | 1.01 | 0.65,1.55 |  | 0.94 | 0.56,1.57 |  |

Model was adjusted for age, sex, race, BMI, smoking status, drinking status, education level, marriage, history of cancer, hypertension, diabetes, alanine aminotransferase, total bilirubin. The aHRs were estimated by setting U.S born participants as reference.

#Cutoff of age subgroup in advance liver fibrosis patients was 75 (median age) due to their older age comparing to other CLD patients.

Abbreviations: BMI, body mass index; CI, confidence intervals; CVD, cardiovascular diseases; HR, hazard ratio; MASLD, metabolic dysfunction-associated steatotic liver disease; NHANES, National Health and Nutrition Examination Survey; SLD, steatotic liver disease; T2D, type 2 diabetes; U.S, United States.

**Supplementary Table 9. Association between nativity and risk of other-cause mortality among participants with chronic liver disease across age, sex, race, BMI categories (NHANES 1999-2018).**

| **Subgroup** | **SLD** | | | **MASLD** | | | **Advanced liver fibrosis #** | | |
| --- | --- | --- | --- | --- | --- | --- | --- | --- | --- |
| aHR | 95%CI | *P* for interaction | aHR | 95%CI | *P* for interaction | aHR | 95%CI | *P* for interaction |
| **Other mortality** |  |  |  |  |  |  |  |  |  |
| **Age** |  |  | 0.243 |  |  | 0.586 |  |  | 0.18 |
| <55 | 0.43 | 0.14,1.28 |  | 0.49 | 0.17,1.41 |  | 0.2 | 0.08,0.52 |  |
| >55 | 0.43 | 0.21,0.90 |  | 0.51 | 0.22,1.15 |  | 0.88 | 0.40,1.93 |  |
| **Sex** |  |  | 0.425 |  |  | 0.243 |  |  | 0.876 |
| Male | 0.61 | 0.25,1.48 |  | 0.68 | 0.26,1.79 |  | 0.33 | 0.14,0.77 |  |
| Female | 0.2 | 0.08,0.56 |  | 0.2 | 0.07,0.58 |  | 0.41 | 0.14,1.23 |  |
| **BMI** |  |  | 0.047 |  |  | 0.034 |  |  | 0.122 |
| <30 | 0.21 | 0.09,0.54 |  | 0.21 | 0.10,0.64 |  | 0.44 | 0.20,0.97 |  |
| ≥30 | 0.74 | 0.31,1.71 |  | 0.8 | 0.34,1.87 |  | 0.94 | 0.35,2.55 |  |
| **Race** | / | | |  |  |  |  |  | 0.020 |
| Mexican American  or Other Hispanic |  |  |  |  |  |  | 0.34 | 0.18,0.65 |  |
| Non-Hispanic White |  |  |  |  |  |  | 1.11 | 0.49,2.50 |  |
| Non-Hispanic Black |  |  |  |  |  |  | 0.16 | 0.02,1.36 |  |
| Other Race |  |  |  |  |  |  | 0.62 | 0.11,3.67 |  |

Model was adjusted forage, sex, race, BMI, smoking status, drinking status, education level, marriage, history of cancer, hypertension, diabetes, alanine aminotransferase, total bilirubin. The aHRs were estimated by setting U.S born participants as reference.

#Cutoff of age subgroup in advance liver fibrosis patients was 75 (median age) due to their older age comparing to other CLD patients.

Abbreviations: BMI, body mass index; CI, confidence intervals; CVD, cardiovascular diseases; aHR, adjusted hazard ratio; MASLD, metabolic dysfunction-associated steatotic liver disease; NHANES, National Health and Nutrition Examination Survey; SLD, steatotic liver disease; T2D, type 2 diabetes; U.S, United States.

**Supplementary Table 10. Control of risk factors related to chronic liver disease in the United States (NHANES 2017-2020)**

| **Risk factors/ treatment** | **SLD (2017-2020)#** | | | |
| --- | --- | --- | --- | --- |
| Overall | U.S. born | Immigrants | *P* value * |
| HDL-C(mg/dL) | 45.0(39.0,54.0) | 45.0(39.0,54.0) | 44.0(38.0,52.0) | 0.028 |
| Total Cholesterol (mg/dL) | 188.0(161.0,217.0) | 188.0(160.0,217.0) | 190.0(168.0,216.0) | 0.200 |
| non HDL-C | 139.0(113.0,168.0) | 138.0(112.0,168.0) | 143.0(121.6,172.0) | 0.008 |
| HbA1c(%) | 5.7(5.3,6.1) | 5.7(5.3,6.1) | 5.7(5.40,6.2) | 0.059 |
| BMI | 32.90(29.00, 37.40) | 33.60(29.60,38.20) | 31.00(27.70,34.70) | <0.001 |
| Alcohol consumption (g/week) | 4.83 (0.40, 42.00) | 4.83 (0.40, 42.00) | 3.62 (0.00, 28.00) | 0.200 |
| Current smoker(n,%) | 431(14.93%) | 330(15.01%) | 101(14.58%) | 0.800 |
| HEI-2020 | 47.48 (38.03, 56.99) | 46.03 (37.06, 55.02) | 52.03 (43.64, 62.42) | <0.001 |
| FIB-4 index | 0.89 (0.58, 1.28) | 0.90 (0.59, 1.33) | 0.82 (0.56, 1.16) | 0.029 |
| LSM(kPa) | 5.60 (4.60,7.10) | 5.70 (4.60,7.30) | 5.50 (4.50,6.60) | 0.023 |
| **Medication (n,%)** |  |  |  |  |
| Insulin | 157(4.66%) | 116(4.75%) | 41(4.33%) | 0.700 |
| Diabetic pills | 522(17.25%) | 339(16.72%) | 183(19.34%) | 0.200 |
| Insulin/Diabetic pills | 589(18.89%) | 391(18.48%) | 198(20.50%) | 0.400 |
| Taking prescription for hypertension | 1,155(40.39%) | 875(43.40%) | 280(28.63%) | <0.001 |
| Taking prescription  for cholesterol | 726(25.22%) | 526(26.61%) | 200(19.76%) | 0.023 |
| **Comorbidity** |  |  |  |  |
| Obesity | 1,782(69.53%) | 1,359(73.01%) | 423(55.87%) | <0.001 |
| Hyperlipidemia | 1,154(46.58%) | 769(46.59%) | 385(46.55%) | >0.9 |
| T2D | 858(26.95%) | 568(26.31%) | 290(29.47%) | 0.200 |
| Hypertension | 1,466(52.78%) | 1,096(55.61%) | 370(41.67%) | <0.001 |
| CVD | 320(11.19%) | 260(12.41%) | 60(6.41%) | 0.008 |
| CKD | 541(18.01%) | 378(18.09%) | 163(17.71%) | 0.900 |

*Statistical analysis was performed by Wilcoxon rank-sum test for complex survey samples or Chi-squared test with Rao & Scott's second-order correction.

# SLD was diagnosed using VCTE exam.

Abbreviations: CKD, chronic kidney disease; CVD, cardiovascular diseases; HEI-2020, healthy eating index 2020; HDL-C, high density lipoprotein cholesterol; LSM, liver stiffness measurement NHANES, National Health and Nutrition Examination Survey; SLD, steatotic liver disease; T2D, type 2 diabetes; U.S, United States.
